# Supplementary material for: Pressure Induced Disorder-Order Phase Transitions in the Al4Cr Phases
Source: MDPI journal article supplement (doi:10.3390/cryst12071008), 2022-07-21
Supplement: s1 [file s1]

Archive with 1 entries (1 files):
- crystals-1806964-supplementary.pdf
