# Supplementary material for: Pressure Induced Disorder-Order Phase Transitions in the Al4Cr Phases
Source: MDPI journal article supplement (doi:10.3390/cryst12071008), 2022-07-21
Supplement: s1 [file s1 › crystals-1806964-supplementary.pdf]

Supplementary materials

# Pressure Induced Disorder-Order Phase Transitions in the Al<sub>4</sub>Cr Phases

Changzeng Fan <sup>1,2,\*</sup>, Xu Geng <sup>1,2</sup> and Bin Wen <sup>1</sup>

**Citation:** Fan, C.; Geng, X.; Wen, B. Pressure Induced Disorder-Order Phase Transitions in the Al<sub>4</sub>Cr Phases. *Crystals* **2022**, *12*, 1008. <https://doi.org/10.3390/cryst12071008>

Academic Editor: Daniel Errandonea

Received: 23 June 2022

Accepted: 19 July 2022

Published: 21 July 2022

**Publisher's Note:** MDPI stays neutral with regard to jurisdictional claims in published maps and institutional affiliations.

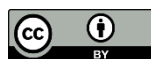

**Copyright:** © 2022 by the authors. Submitted for possible open access publication under the terms and conditions of the Creative Commons Attribution (CC BY) license (<https://creativecommons.org/licenses/by/4.0/>).

- <sup>1</sup> State Key Laboratory of Metastable Materials Science and Technology, Yanshan University, Qinhuangdao 066004, China; gengxuysl@126.com (X.G.); wenbin@ysu.edu.cn (B.W.)  
<sup>2</sup> Hebei Key Lab for optimizing metal product technology and performance, College of Materials Science and Technology, Yanshan University, Qinhuangdao 066004, China  
 \* Correspondence: email: chzfan@ysu.edu.cn

**Table S1.** The Wyckoff positions of the centered atoms inside the Macky or pseudo-Mackay cluster for the  $\epsilon$ - and  $\mu$ -Al<sub>4</sub>Cr phase along with the  $\eta$ -Al<sub>11</sub>Cr<sub>2</sub> phase.

| Nanocluster Type        | Phase                                                                   | Center Atom Coordinates of Nanocluster                                                                                                                                                                                      |
|-------------------------|-------------------------------------------------------------------------|-----------------------------------------------------------------------------------------------------------------------------------------------------------------------------------------------------------------------------|
| Mackay<br>(1 @ 12 @ 42) | $\epsilon$ -Al <sub>4</sub> Cr<br>1 @ 12 @ 42                           | Cr10(0.50000, -0.06080, 0.25000) (4c; m2m)                                                                                                                                                                                  |
|                         | $\eta$ -Al <sub>11</sub> Cr <sub>2</sub> pseudo-Mackay<br>1 @ 12 @ 38   | Cr11(0.25000, 0.75000, 0.50000) (4c; -1)                                                                                                                                                                                    |
|                         | $\mu$ -Al <sub>4</sub> Cr pseudo-Mackay<br>1 @ 12 @ 41                  | Cr2(0.00000, 0.00000, 0.25000) (2b; -6m2)                                                                                                                                                                                   |
|                         | $\theta$ -Al <sub>45</sub> Cr <sub>7</sub> pseudo-Mackay<br>1 @ 12 @ 38 | Cr3(0.50000, 0.50000, 0.50000) (2c; 2/m)                                                                                                                                                                                    |
|                         |                                                                         | Al13(0.50000, 0.18285, 0.25000) (4c; m2m)<br>Al14(0.50000, 0.07444, 0.25000) (4c; m2m)<br>Al17(0.50000, 0.25398, 0.17920) (8f; m..)<br>Al23(0.00000, 0.19190, 0.51390) (8f; m..)<br>Al27(0.81860, 0.14117, 0.13300) (16h 1) |
| 1 @ 12 @ 46             | $\epsilon$ -Al <sub>4</sub> Cr                                          |                                                                                                                                                                                                                             |
|                         | $\eta$ -Al <sub>11</sub> Cr <sub>2</sub>                                | Al36(0.44124, 0.64688, 0.49235) (8f; 1)<br>Al28(0.75770, 0.85334, 0.80867) (8f; 1)                                                                                                                                          |
|                         | $\mu$ -Al <sub>4</sub> Cr                                               | Al3(0.25590, 0.36707, 0.49559) (24l; 1)<br>Al10(0.03077, -0.41351, 0.15948) (24l; 1)<br>Al22(0.50978, 0.49022, 0.25000) (6h; mm2)<br>Al23(-0.23891, 0.38054, 0.25000) (6h mm2)                                              |
